# Supplementary material for: The Psychology of Sharing: Multigroup Analysis among Users and Non-Users of Carsharing
Source: MDPI journal article supplement (doi:10.3390/su13126842), 2021-06-17
Supplement: s1 [file s1]

# Supplementary material

Érika Martins Silva Ramos and Cecilia Jakobsson Bergstad

May 4th, 2021

## Introduction

This file shows the data analysis for the paper *“The psychology of sharing: Multigroup analysis among users and non-users of carsharing”* and the document is generated automatically with the analysis. It’s ultimate goal is to facilitate replication, once that it can be fully reproduced.

## Data description

### Codebook

In this subsection, the assessment of all variables are described.

- U\_BI: *“I will continue to use carsharing”*. (users)
- NU\_BI: *“I will become a member of a carsharing”*. (non-users)
- BI: U\_BI and NU\_BI are combined in one single variable
- BehaviorInt: latent variable Behavior Intention assessed by the item BI
- H1: *“I feel strange travelling without a car”*.
- H2: *“I use the car without planning ahead”*.
- H3: *“It would require an effort for me not to use a car”*.
- H4: *“Using a car is part of my daily routine”*.
- H5: *“Using a car is something that I do automatically”*.
- H6: *“I have been using a car for a long time”*.
- H7: *“Driving a car saves time”*.
- H8: *“Driving a car makes life easier”*.
- Habit: Latent variable assessed by the items H1-H8
- EA1: *“It is urgent to do something against the ecological destruction caused by using the car”*.
- EA2: *“I believe that using the car causes many environmental problems”*.
- PN1: *“I feel morally obliged to reduce the environmental impact due to my travel patterns”*.
- PN2: *“I would feel guilty if I did not reduce the environmental impact of my travel patterns”*.
- CM: latent variable Climate Morality, assessed by the items EA1, EA2, PN1, PN2
- U\_SN1: *“People who are important to me think that I should use carsharing instead of other modes of transportation”*. (users)
- NU\_SN1: *“People who are important to me think that I should use carsharing instead of other modes of transportation”*. (non-users)
- SN1: U\_SN1 and NU\_SN1 are combined in one single variable
- U\_SN2: *“People who are important to me like that I use carsharing”*. (users)
- NU\_SN2: *“People who are important to me would like that I use carsharing”*. (non-users)
- SN2: U\_SN2 and NU\_SN2 are combined in one single variable

- U\_SN3: “People who are important to me agree with my use of carsharing”. (users)
- NU\_SN3: “People who are important to me would agree if I use carsharing”. (non-users)
- SN3: U\_SN3 and NU\_SN3 are combined in one single variable
- SN: latent variable Subjective Norms, assessed by SN1, SN2, SN3
- U\_PBC1: “It is possible for me to use carsharing for my regular trips”. (users)
- NU\_PBC1: “It would be possible for me to use carsharing for my regular trips”. (non-users)
- PBC1: U\_PBC1 and NU\_PBC1 are combined in one single variable
- U\_PBC2: “I am sure that I can choose the carsharing for my regular trips during the next week”. (users)
- NU\_PBC2: “I am sure that I can choose the carsharing for my regular trips during the next week”. (non-users)
- PBC2: U\_PBC2 and NU\_PBC2 are combined in one single variable
- U\_EOU1: “Learning how to use carsharing was easy for me”. (users)
- NU\_EOU1: “Learning how to use carsharing would be easy for me”. (non-users)
- EOU1: U\_EOU1 and NU\_EOU1 are combined in one single variable
- U\_EOU2: “I find carsharing easy to use”. (users)
- NU\_EOU2: “I would find carsharing easy to use”. (non-users)
- EOU2: U\_EOU2 and NU\_EOU2 are combined in one single variable
- U\_PU1: “Carsharing services is a useful mode of transport”. (users)
- NU\_PU1: “Using carsharing services would be a useful mode of transport”. (non-users)
- PU1: U\_PU1 and NU\_PU1 are combined in one single variable
- U\_PU2: “Carsharing helps me to accomplish activities that are important to me”. (users)
- NU\_PU2: “Using carsharing would help me to accomplish activities that are important to me”. (non-users)
- PU2: U\_PU2 and NU\_PU2 are combined in one single variable
- U\_T1: “Based on my previous experience with carsharing, I know that it provides a good service”. (users)
- NU\_T1: “Based on my knowledge about carsharing, I think that it provides a good service”. (non-users)
- T1: U\_T1 and NU\_T1 are combined in one single variable
- U\_T2: “Based on my previous experience with carsharing, I know that it is predictable”. (users)
- NU\_T2: “Based on my knowledge about carsharing, I think that it is predictable”. (non-users)
- T2: U\_T2 and NU\_T2 are combined in one single variable
- U\_T3: “Based on my previous experience with carsharing, I know that it is trustworthy”. (users)
- NU\_T3: “Based on my knowledge about carsharing, I think that it is trustworthy”. (non-users)
- T3: U\_T3 and NU\_T3 are combined in one single variable
- group: gr1: Italian non-users; gr2: Italian users; gr3: Swedish non-users; gr4: Swedish users
- country: country where the participant was leaving at the time of the application of the survey (15=Italy; 27=Sweden)
- age: year of birth
- sex: female (0) or male (1)
- edu: highest level of education completed 1 = “Not completed primary school” 2 = “Elementary school” 3 = “Upper secondary school or equivalent, shorter than 3 years” 4 = “Upper secondary school or equivalent, 3 years or more” 5 = “Post-secondary education, not college, less than 3 years” 6 = “Post-secondary education, not college, 3 years or more” 7 = “University / University, less than 3 years old” 8 = “University / University, 3 years or more” 9 = “Degree from postgraduate studies”
- income: montly income before taxes 1 = Less than 380 euros 2 = 380 – 849 euros 3 = 850 – 1249 euros 4 = 1250 – 1499 euros 5 = 1500 – 1799 euros 6 = 1800 – 2199 euros 7 = 2200 – 2499 euros 8 = 2500 – 2849 euros 9 = 2850 – 3499 euros 10 = 3500 – 4249 euros 11 = 4250 – 5999 euros 12 = More than 6000 euros 13 = I do not know/ I do not want to answer 14 = Other
- no\_child: any children in the household (0/1)
- child\_age\_0to3: presence of children from 0 to 3 years old in the household (0/1)
- child\_age\_4to6: presence of children from 4 to 6 years old in the household (0/1)
- child\_age\_7to15: presence of children from 7 to 15 years old in the household (0/1)
- child\_age\_16: presence of children from 16 years or more in the household (0/1)

## Dataset

```
d<-read.csv("dataset_carsharing.csv")
```

## Descriptive statistics

```
d_variables <- d %>% dplyr::select(group,  
                                   BI,  
                                   H1,  
                                   H2,  
                                   H3,  
                                   H4,  
                                   H5,  
                                   H6,  
                                   H7,  
                                   H8,  
                                   EA1,  
                                   EA2,  
                                   PN1,  
                                   PN2,  
                                   SN1,  
                                   SN2,  
                                   SN3,  
                                   PBC1,  
                                   PBC2,  
                                   EOU1,  
                                   EOU2,  
                                   PU1,  
                                   PU2,  
                                   T1,  
                                   T2,  
                                   T3)
```

Code for the tables visualization (missing, mean and standard deviation)

```
d_variables %>%  
  dplyr::group_by(group) %>%  
  summarise_all(list(~sum(is.na(.)))) %>%  
  knitr::kable(caption = 'Number of missing per group', digits = 0) %>%  
  kableExtra::landscape() %>%  
  kableExtra::kable_styling(latex_options = "scale_down")  
  
d_variables %>%  
  dplyr::group_by(group) %>%  
  summarise_all(list(~mean(., na.rm = T))) %>%  
  knitr::kable(caption = 'Mean value per group', digits = 2) %>%  
  kableExtra::landscape() %>%  
  kableExtra::kable_styling(latex_options = "scale_down")  
  
d_variables %>%
```

```
dplyr::group_by(group) %>%  
summarise_all(list(~sd(., na.rm = T))) %>%  
knitr::kable(caption = 'Sd value per group', digits = 2) %>%  
kableExtra::landscape() %>%  
  kableExtra::kable_styling(latex_options = "scale_down")
```

Table 1: Number of missing per group

| group  | BI  | H1  | H2  | H3  | H4  | H5  | H6  | H7  | H8  | EA1 | EA2 | PN1 | PN2 | SN1 | SN2 | SN3 | PBC1 | PBC2 | EOU1 | EOU2 | PU1 | PU2 | T1  | T2  | T3  |
|--------|-----|-----|-----|-----|-----|-----|-----|-----|-----|-----|-----|-----|-----|-----|-----|-----|------|------|------|------|-----|-----|-----|-----|-----|
| itnon  | 1   | 77  | 78  | 77  | 77  | 77  | 77  | 77  | 77  | 0   | 0   | 0   | 1   | 1   | 1   | 1   | 0    | 1    | 0    | 0    | 0   | 0   | 18  | 39  | 22  |
| ituser | 445 | 20  | 22  | 20  | 19  | 20  | 21  | 20  | 19  | 3   | 3   | 3   | 3   | 5   | 6   | 6   | 1    | 1    | 1    | 1    | 1   | 2   | 5   | 129 | 20  |
| senon  | 26  | 229 | 229 | 230 | 227 | 230 | 229 | 228 | 229 | 23  | 23  | 23  | 26  | 44  | 43  | 44  | 22   | 25   | 30   | 28   | 30  | 25  | 659 | 770 | 720 |
| seuser | 19  | 71  | 71  | 74  | 71  | 73  | 73  | 71  | 70  | 16  | 15  | 16  | 18  | 28  | 32  | 30  | 15   | 10   | 17   | 23   | 10  | 10  | 151 | 206 | 148 |

Table 2: Mean value per group

| group  | BI   | H1   | H2   | H3   | H4   | H5   | H6   | H7   | H8   | EA1  | EA2  | PN1  | PN2  | SN1  | SN2  | SN3  | PBC1 | PBC2 | EOU1 | EOU2 | PU1  | PU2  | T1   | T2   | T3   |
|--------|------|------|------|------|------|------|------|------|------|------|------|------|------|------|------|------|------|------|------|------|------|------|------|------|------|
| itnon  | 2.92 | 3.37 | 5.55 | 4.24 | 3.90 | 4.90 | 4.31 | 4.87 | 3.89 | 5.79 | 5.58 | 4.89 | 4.63 | 2.48 | 2.44 | 4.00 | 3.31 | 2.52 | 4.77 | 4.46 | 4.63 | 3.37 | 4.69 | 4.33 | 4.73 |
| ituser | 4.61 | 3.32 | 5.04 | 3.96 | 3.94 | 4.88 | 4.23 | 4.84 | 3.81 | 5.84 | 5.53 | 5.11 | 4.90 | 4.25 | 4.43 | 5.18 | 4.19 | 3.86 | 5.55 | 5.53 | 5.53 | 4.42 | 5.22 | 4.72 | 5.21 |
| senon  | 1.34 | 2.98 | 3.50 | 4.17 | 3.78 | 3.41 | 5.44 | 5.35 | 5.54 | 5.09 | 5.19 | 3.98 | 3.39 | 2.11 | 3.35 | 3.90 | 2.58 | 2.25 | 4.45 | 3.90 | 3.40 | 2.52 | 4.47 | 4.20 | 4.36 |
| seuser | 4.02 | 2.07 | 2.73 | 3.16 | 2.74 | 2.43 | 4.69 | 4.60 | 4.82 | 5.63 | 5.72 | 4.58 | 3.92 | 3.48 | 4.46 | 4.80 | 3.26 | 3.59 | 5.63 | 5.35 | 4.94 | 4.07 | 5.38 | 5.02 | 5.33 |

Table 3: Sd value per group

| group  | BI   | H1   | H2   | H3   | H4   | H5   | H6   | H7   | H8   | EA1  | EA2  | PN1  | PN2  | SN1  | SN2  | SN3  | PBC1 | PBC2 | EOU1 | EOU2 | PU1  | PU2  | T1   | T2   | T3   |
|--------|------|------|------|------|------|------|------|------|------|------|------|------|------|------|------|------|------|------|------|------|------|------|------|------|------|
| itnon  | 1.51 | 1.94 | 1.90 | 2.20 | 2.01 | 1.78 | 2.02 | 1.75 | 2.03 | 1.45 | 1.48 | 1.68 | 1.74 | 1.62 | 1.60 | 1.93 | 1.72 | 1.66 | 1.68 | 1.65 | 1.62 | 1.70 | 1.32 | 1.24 | 1.32 |
| ituser | 1.71 | 2.01 | 1.95 | 2.18 | 2.01 | 1.70 | 2.06 | 1.71 | 2.01 | 1.51 | 1.59 | 1.67 | 1.72 | 1.80 | 1.74 | 1.51 | 1.81 | 1.88 | 1.46 | 1.41 | 1.43 | 1.70 | 1.34 | 1.34 | 1.26 |
| senon  | 0.84 | 2.15 | 2.28 | 2.33 | 2.47 | 2.27 | 2.18 | 1.82 | 1.77 | 2.03 | 1.91 | 2.27 | 2.18 | 1.51 | 1.96 | 2.07 | 1.87 | 1.79 | 2.21 | 2.07 | 2.00 | 1.81 | 1.55 | 1.50 | 1.53 |
| seuser | 2.55 | 1.75 | 2.13 | 2.23 | 2.21 | 1.96 | 2.33 | 1.90 | 1.90 | 1.83 | 1.73 | 2.25 | 2.25 | 1.99 | 1.84 | 1.79 | 2.18 | 2.32 | 1.58 | 1.73 | 1.79 | 2.18 | 1.44 | 1.47 | 1.37 |

## Analysis

The following packages were used for the analysis:

```
library("lavaan")
library("piecewiseSEM")
library("semPlot")
library("tidyverse")
library("semTools")
library("sjPlot")
library("psych")
library("Lambda4")
library("semTable")
set.seed(1) #to always obtain the same values
```

### Alpha (Lambda3) and Lambda2

Italy

```
print('Italy Users - habits')
```

```
## [1] "Italy Users - habits"
```

```
dlambda <- d %>%
  dplyr::filter(group=='ituser') %>%
  dplyr::select(H1,H2,H3,H4,H5,H6,H7,H8)
dlambda %>% Lambda4::lambda3()
```

```
## Coefficient Alpha (Guttman's Lambda 3 Coefficient)
```

```
##
```

```
## Unstandardized
```

```
## 0.9
```

```
##
```

```
## Standardized
```

```
## 0.9
```

```
##
```

```
## Item Statistics
```

|    | Mean  | SD    | Obs  | If.Dropped |
|----|-------|-------|------|------------|
| H1 | 3.319 | 2.012 | 1357 | 0.870      |
| H2 | 5.044 | 1.948 | 1355 | 0.886      |
| H3 | 3.957 | 2.178 | 1357 | 0.859      |
| H4 | 3.937 | 2.011 | 1358 | 0.862      |
| H5 | 4.884 | 1.705 | 1357 | 0.872      |
| H6 | 4.235 | 2.059 | 1356 | 0.858      |
| H7 | 4.840 | 1.705 | 1357 | 0.872      |
| H8 | 3.813 | 2.011 | 1358 | 0.870      |

```
dlambda %>% Lambda4::lambda2()
```

```
## Guttman's Lambda 2 Coefficient:
```

```
## 0.897
```



```
print('Italy Non-users - habits')
```

```
## [1] "Italy Non-users - habits"
```

```
dlambda <- d %>%  
  dplyr::filter(group=='itnon') %>%  
  dplyr::select(H1,H2,H3,H4,H5,H6,H7,H8)  
dlambda %>% Lambda4::lambda3()
```

```
## Coefficient Alpha (Guttman's Lambda 3 Coefficient)
```

```
##
```

```
## Unstandardized
```

```
## 0.897
```

```
##
```

```
## Standardized
```

```
## 0.896
```

```
##
```

```
## Item Statistics
```

```
##      Mean      SD  Obs If.Dropped
```

```
## H1 3.370 1.945 1797      0.868
```

```
## H2 5.547 1.895 1796      0.883
```

```
## H3 4.243 2.200 1797      0.855
```

```
## H4 3.898 2.005 1797      0.862
```

```
## H5 4.898 1.782 1797      0.867
```

```
## H6 4.315 2.017 1797      0.854
```

```
## H7 4.865 1.745 1797      0.869
```

```
## H8 3.886 2.031 1797      0.865
```

```
dlambda %>% Lambda4::lambda2()
```

```
## Guttman's Lambda 2 Coefficient:
```

```
## 0.893
```

```
print('Italy Users - CM')
```

```
## [1] "Italy Users - CM"
```

```
dlambda <- d %>%  
  dplyr::filter(group=='ituser') %>%  
  dplyr::select(EA1,EA2,PN1,PN2)  
dlambda %>% Lambda4::lambda3()
```

```
## Coefficient Alpha (Guttman's Lambda 3 Coefficient)
```

```
##
```

```
## Unstandardized
```

```
## 0.865
```

```
##
```

```
## Standardized
```

```
## 0.866
```

```
##
```

```
## Item Statistics
##      Mean    SD  Obs If.Dropped
## EA1 5.840 1.506 1374      0.740
## EA2 5.528 1.588 1374      0.742
## PN1 5.107 1.674 1374      0.713
## PN2 4.900 1.721 1374      0.747
```

```
dlambda %>% Lambda4::lambda2()
```

```
## Guttman's Lambda 2 Coefficient:
## 0.84
```

```
print('Italy Non-users - CM')
```

```
## [1] "Italy Non-users - CM"
```

```
dlambda <- d %>%
  dplyr::filter(group=='itnon') %>%
  dplyr::select(EA1,EA2,PN1,PN2)
dlambda %>% Lambda4::lambda3()
```

```
## Coefficient Alpha (Guttman's Lambda 3 Coefficient)
##
## Unstandardized
## 0.87
##
## Standardized
## 0.872
##
## Item Statistics
##      Mean    SD  Obs If.Dropped
## EA1 5.787 1.453 1874      0.746
## EA2 5.576 1.482 1874      0.743
## PN1 4.889 1.678 1874      0.726
## PN2 4.629 1.739 1873      0.747
```

```
dlambda %>% Lambda4::lambda2()
```

```
## Guttman's Lambda 2 Coefficient:
## 0.845
```

```
print('Italy Users - SN')
```

```
## [1] "Italy Users - SN"
```

```
dlambda <- d %>%
  dplyr::filter(group=='ituser') %>%
  dplyr::select(U_SN1,U_SN2,U_SN3)
dlambda %>% Lambda4::lambda3()
```

```
## Coefficient Alpha (Guttman's Lambda 3 Coefficient)
##
## Unstandardized
## 0.876
##
## Standardized
## 0.88
##
## Item Statistics
##      Mean    SD Obs If.Dropped
## U_SN1 4.776 1.660 818      0.653
## U_SN2 5.070 1.469 817      0.569
## U_SN3 5.483 1.391 818      0.632
```

```
dlambda %>% Lambda4::lambda2()
```

```
## Guttman's Lambda 2 Coefficient:
## 0.823
```

```
print('Italy Non-users - SN')
```

```
## [1] "Italy Non-users - SN"
```

```
dlambda <- d %>%
  dplyr::filter(group=='itnon') %>%
  dplyr::select(NU_SN1,NU_SN2,NU_SN3)
dlambda %>% Lambda4::lambda3()
```

```
## Coefficient Alpha (Guttman's Lambda 3 Coefficient)
##
## Unstandardized
## 0.793
##
## Standardized
## 0.809
##
## Item Statistics
##      Mean    SD Obs If.Dropped
## NU_SN1 2.477 1.616 1873      0.438
## NU_SN2 2.440 1.603 1873      0.445
## NU_SN3 3.999 1.931 1873      0.714
```

```
dlambda %>% Lambda4::lambda2()
```

```
## Guttman's Lambda 2 Coefficient:
## 0.753
```

```
print('Italy Users - Control')
```

```
## [1] "Italy Users - Control"
```

```
dlambda <- d %>%
  dplyr::filter(group=='ituser') %>%
  dplyr::select(U_PBC1,U_PBC2,U_EOU1,U_EOU2,U_PU1,U_PU2)
dlambda %>% Lambda4::lambda3()
```

```
## Coefficient Alpha (Guttman's Lambda 3 Coefficient)
##
## Unstandardized
## 0.798
##
## Standardized
## 0.801
##
## Item Statistics
##      Mean    SD  Obs If.Dropped
## U_PBC1 4.188 1.814 1376      0.727
## U_PBC2 3.864 1.883 1376      0.738
## U_EOU1 5.554 1.462 1376      0.747
## U_EOU2 5.529 1.407 1376      0.736
## U_PU1  5.533 1.426 1376      0.749
## U_PU2  4.420 1.698 1375      0.720
```

```
dlambda %>% Lambda4::lambda2()
```

```
## Guttman's Lambda 2 Coefficient:
## 0.799
```

```
print('Italy Non-users - Control')
```

```
## [1] "Italy Non-users - Control"
```

```
dlambda <- d %>%
  dplyr::filter(group=='itnon') %>%
  dplyr::select(NU_PBC1,NU_PBC2,NU_EOU1,NU_EOU2,NU_PU1,NU_PU2)
dlambda %>% Lambda4::lambda3()
```

```
## Coefficient Alpha (Guttman's Lambda 3 Coefficient)
##
## Unstandardized
## 0.809
##
## Standardized
## 0.808
##
## Item Statistics
##      Mean    SD  Obs If.Dropped
## NU_PBC1 3.311 1.723 1874      0.738
## NU_PBC2 2.519 1.655 1873      0.773
## NU_EOU1 4.767 1.681 1874      0.758
## NU_EOU2 4.459 1.653 1874      0.741
## NU_PU1  4.634 1.625 1874      0.746
## NU_PU2  3.368 1.699 1874      0.728
```

```
dlambda %>% Lambda4::lambda2()
```

```
## Guttman's Lambda 2 Coefficient:  
## 0.803
```

```
print('Italy Users - Trust')
```

```
## [1] "Italy Users - Trust"
```

```
dlambda <- d %>%  
  dplyr::filter(group=='ituser') %>%  
  dplyr::select(U_T1,U_T2,U_T3)  
dlambda %>% Lambda4::lambda3()
```

```
## Coefficient Alpha (Guttman's Lambda 3 Coefficient)  
##  
## Unstandardized  
## 0.823  
##  
## Standardized  
## 0.824  
##  
## Item Statistics  
##      Mean    SD  Obs If.Dropped  
## U_T1 5.224 1.339 1372      0.531  
## U_T2 4.722 1.340 1248      0.626  
## U_T3 5.214 1.264 1357      0.538
```

```
dlambda %>% Lambda4::lambda2()
```

```
## Guttman's Lambda 2 Coefficient:  
## 0.774
```

```
print('Italy Non-users - Trust')
```

```
## [1] "Italy Non-users - Trust"
```

```
dlambda <- d %>%  
  dplyr::filter(group=='itnon') %>%  
  dplyr::select(NU_T1,NU_T2,NU_T3)  
dlambda %>% Lambda4::lambda3()
```

```
## Coefficient Alpha (Guttman's Lambda 3 Coefficient)  
##  
## Unstandardized  
## 0.881  
##  
## Standardized  
## 0.88
```

```
##
## Item Statistics
##      Mean    SD  Obs If.Dropped
## NU_T1 4.693 1.316 1856      0.605
## NU_T2 4.334 1.244 1835      0.665
## NU_T3 4.731 1.319 1852      0.595
```

```
dlambda %>% Lambda4::lambda2()
```

```
## Guttman's Lambda 2 Coefficient:
## 0.829
```

## Sweden

```
print('Sweden Users - habits')
```

```
## [1] "Sweden Users - habits"
```

```
dlambda <- d %>%
  dplyr::filter(group=='seuser') %>%
  dplyr::select(H1,H2,H3,H4,H5,H6,H7,H8)
dlambda %>% Lambda4::lambda3()
```

```
## Coefficient Alpha (Guttman's Lambda 3 Coefficient)
##
## Unstandardized
## 0.901
##
## Standardized
## 0.904
##
## Item Statistics
##      Mean    SD  Obs If.Dropped
## H1 2.066 1.748 997      0.873
## H2 2.730 2.129 997      0.871
## H3 3.162 2.226 994      0.863
## H4 2.736 2.213 997      0.861
## H5 2.433 1.959 995      0.863
## H6 4.694 2.332 995      0.890
## H7 4.597 1.904 997      0.871
## H8 4.825 1.897 998      0.869
```

```
dlambda %>% Lambda4::lambda2()
```

```
## Guttman's Lambda 2 Coefficient:
## 0.897
```

```
print('Sweden Non-users - habits')
```

```
## [1] "Sweden Non-users - habits"
```

```
dlambda <- d %>%
  dplyr::filter(group=='senon') %>%
  dplyr::select(H1,H2,H3,H4,H5,H6,H7,H8)
dlambda %>% Lambda4::lambda3()
```

```
## Coefficient Alpha (Guttman's Lambda 3 Coefficient)
##
## Unstandardized
## 0.917
##
## Standardized
## 0.919
##
## Item Statistics
##      Mean    SD  Obs If.Dropped
## H1 2.978 2.154 1524      0.891
## H2 3.500 2.284 1524      0.891
## H3 4.168 2.327 1523      0.883
## H4 3.780 2.465 1526      0.883
## H5 3.412 2.268 1523      0.882
## H6 5.443 2.175 1524      0.898
## H7 5.353 1.819 1525      0.888
## H8 5.545 1.772 1524      0.888
```

```
dlambda %>% Lambda4::lambda2()
```

```
## Guttman's Lambda 2 Coefficient:
## 0.913
```

```
print('Sweden Users - CM')
```

```
## [1] "Sweden Users - CM"
```

```
dlambda <- d %>%
  dplyr::filter(group=='seuser') %>%
  dplyr::select(EA1,EA2,PN1,PN2)
dlambda %>% Lambda4::lambda3()
```

```
## Coefficient Alpha (Guttman's Lambda 3 Coefficient)
##
## Unstandardized
## 0.881
##
## Standardized
## 0.885
##
## Item Statistics
##      Mean    SD  Obs If.Dropped
## EA1 5.632 1.830 1052      0.752
## EA2 5.722 1.729 1053      0.766
## PN1 4.577 2.246 1052      0.732
## PN2 3.923 2.251 1050      0.758
```

```
dlambda %>% Lambda4::lambda2()
```

```
## Guttman's Lambda 2 Coefficient:  
## 0.858
```

```
print('Sweden Non-users - CM')
```

```
## [1] "Sweden Non-users - CM"
```

```
dlambda <- d %>%  
  dplyr::filter(group=='senon') %>%  
  dplyr::select(EA1,EA2,PN1,PN2)  
dlambda %>% Lambda4::lambda3()
```

```
## Coefficient Alpha (Guttman's Lambda 3 Coefficient)  
##  
## Unstandardized  
## 0.874  
##  
## Standardized  
## 0.875  
##  
## Item Statistics  
##      Mean    SD  Obs If.Dropped  
## EA1 5.086 2.030 1730      0.740  
## EA2 5.194 1.906 1730      0.754  
## PN1 3.976 2.267 1730      0.736  
## PN2 3.387 2.183 1727      0.751
```

```
dlambda %>% Lambda4::lambda2()
```

```
## Guttman's Lambda 2 Coefficient:  
## 0.851
```

```
print('Sweden Users - SN')
```

```
## [1] "Sweden Users - SN"
```

```
dlambda <- d %>%  
  dplyr::filter(group=='seuser') %>%  
  dplyr::select(U_SN1,U_SN2,U_SN3)  
dlambda %>% Lambda4::lambda3()
```

```
## Coefficient Alpha (Guttman's Lambda 3 Coefficient)  
##  
## Unstandardized  
## 0.872  
##  
## Standardized
```



```
## 0.879
##
## Item Statistics
##      Mean    SD Obs If.Dropped
## U_SN1 4.350 1.826 548      0.702
## U_SN2 5.033 1.593 547      0.552
## U_SN3 5.184 1.587 548      0.590
```

```
dlambda %>% Lambda4::lambda2()
```

```
## Guttman's Lambda 2 Coefficient:
## 0.82
```

```
print('Sweden Non-users - SN')
```

```
## [1] "Sweden Non-users - SN"
```

```
dlambda <- d %>%
  dplyr::filter(group=='senon') %>%
  dplyr::select(NU_SN1,NU_SN2,NU_SN3)
dlambda %>% Lambda4::lambda3()
```

```
## Coefficient Alpha (Guttman's Lambda 3 Coefficient)
##
## Unstandardized
## 0.791
##
## Standardized
## 0.79
##
## Item Statistics
##      Mean    SD Obs If.Dropped
## NU_SN1 2.105 1.511 1709      0.635
## NU_SN2 3.350 1.961 1710      0.405
## NU_SN3 3.901 2.068 1709      0.517
```

```
dlambda %>% Lambda4::lambda2()
```

```
## Guttman's Lambda 2 Coefficient:
## 0.759
```

```
print('Sweden Users - Control')
```

```
## [1] "Sweden Users - Control"
```

```
dlambda <- d %>%
  dplyr::filter(group=='seuser') %>%
  dplyr::select(U_PBC1,U_PBC2,U_EOU1,U_EOU2,U_PU1,U_PU2)
dlambda %>% Lambda4::lambda3()
```

```
## Coefficient Alpha (Guttman's Lambda 3 Coefficient)
##
## Unstandardized
## 0.838
##
## Standardized
## 0.842
##
## Item Statistics
##      Mean    SD  Obs If.Dropped
## U_PBC1 3.264 2.180 1053      0.787
## U_PBC2 3.591 2.324 1058      0.774
## U_EOU1 5.625 1.578 1051      0.793
## U_EOU2 5.346 1.735 1045      0.776
## U_PU1  4.940 1.792 1058      0.778
## U_PU2  4.073 2.177 1058      0.763
```

```
dlambda %>% Lambda4::lambda2()
```

```
## Guttman's Lambda 2 Coefficient:
## 0.833
```

```
print('Sweden Non-users - Control')
```

```
## [1] "Sweden Non-users - Control"
```

```
dlambda <- d %>%
  dplyr::filter(group=='senon') %>%
  dplyr::select(NU_PBC1,NU_PBC2,NU_EOU1,NU_EOU2,NU_PU1,NU_PU2)
dlambda %>% Lambda4::lambda3()
```

```
## Coefficient Alpha (Guttman's Lambda 3 Coefficient)
##
## Unstandardized
## 0.84
##
## Standardized
## 0.841
##
## Item Statistics
##      Mean    SD  Obs If.Dropped
## NU_PBC1 2.583 1.867 1731      0.786
## NU_PBC2 2.254 1.786 1728      0.793
## NU_EOU1 4.447 2.208 1723      0.786
## NU_EOU2 3.895 2.069 1725      0.769
## NU_PU1  3.395 2.004 1723      0.772
## NU_PU2  2.519 1.808 1728      0.783
```

```
dlambda %>% Lambda4::lambda2()
```

```
## Guttman's Lambda 2 Coefficient:
## 0.835
```

```
print('Sweden Users - Trust')
```

```
## [1] "Sweden Users - Trust"
```

```
dlambda <- d %>%  
  dplyr::filter(group=='seuser') %>%  
  dplyr::select(U_T1,U_T2,U_T3)  
dlambda %>% Lambda4::lambda3()
```

```
## Coefficient Alpha (Guttman's Lambda 3 Coefficient)
```

```
##
```

```
## Unstandardized
```

```
## 0.896
```

```
##
```

```
## Standardized
```

```
## 0.896
```

```
##
```

```
## Item Statistics
```

|         | Mean  | SD    | Obs | If.Dropped |
|---------|-------|-------|-----|------------|
| ## U_T1 | 5.379 | 1.437 | 917 | 0.662      |
| ## U_T2 | 5.016 | 1.467 | 862 | 0.641      |
| ## U_T3 | 5.333 | 1.366 | 920 | 0.611      |

```
dlambda %>% Lambda4::lambda2()
```

```
## Guttman's Lambda 2 Coefficient:
```

```
## 0.841
```

```
print('Sweden Non-users - Trust')
```

```
## [1] "Sweden Non-users - Trust"
```

```
dlambda <- d %>%  
  dplyr::filter(group=='senon') %>%  
  dplyr::select(NU_T1,NU_T2,NU_T3)  
dlambda %>% Lambda4::lambda3()
```

```
## Coefficient Alpha (Guttman's Lambda 3 Coefficient)
```

```
##
```

```
## Unstandardized
```

```
## 0.909
```

```
##
```

```
## Standardized
```

```
## 0.909
```

```
##
```

```
## Item Statistics
```

|          | Mean  | SD    | Obs  | If.Dropped |
|----------|-------|-------|------|------------|
| ## NU_T1 | 4.474 | 1.553 | 1094 | 0.679      |
| ## NU_T2 | 4.203 | 1.499 | 983  | 0.642      |
| ## NU_T3 | 4.365 | 1.529 | 1033 | 0.634      |

```
dlambda %>% Lambda4::lambda2()
```

```
## Guttman's Lambda 2 Coefficient:  
## 0.853
```

## Analysis of configural invariance

For the analysis of invariance (configural, metric, scalar), run:

```
model1 <- 'BehaviorInt =~ BI  
Habit =~ H1 + H2 + H3 + H4 + H5 + H6 + H7 + H8  
H2~~H5 + H6 + H7  
H8~~H5 + H7 + H2 + H6 + H4  
H5~~H6  
CM =~ EA1 + EA2 + PN1 + PN2  
PN1~~PN2  
EA1~~EA2  
SN =~ SN1 + SN2 + SN3  
SN1~~SN3  
SN2~~PU1  
Control =~ PBC1 + PBC2 + EOU1 + EOU2 + PU1 + PU2  
EOU1~~EOU2  
PBC1~~PBC2  
PU2~~EOU1 + EOU2  
PBC2~~PU1 + SN2 + SN3  
Trust =~ T1 + T2 + T3  
BehaviorInt~ Habit + CM + SN + Control + Trust'  
  
fit1 <- cfa(model1,  
  data= d,  
  std.lv = TRUE,  
  group="group",  
  missing="fiml",  
  se="robust.mlr")
```

To obtain Chi-squared, degrees of freedom, *p*-value, CFI and RMSEA (with lower and upper ci and *p*-value), run:

```
fit1measures<-lavaan::fitmeasures(fit1)  
fit1measures[c('chisq',  
  'df',  
  'pvalue',  
  'cfi',  
  'rmsea',  
  'rmsea.ci.lower',  
  'rmsea.ci.upper',  
  'rmsea.pvalue')]
```

| ## | chisq          | df             | pvalue       | cfi          | rmsea        |
|----|----------------|----------------|--------------|--------------|--------------|
| ## | 5.394604e+03   | 9.640000e+02   | 0.000000e+00 | 9.484378e-01 | 5.503369e-02 |
| ## | rmsea.ci.lower | rmsea.ci.upper | rmsea.pvalue |              |              |
| ## | 5.360645e-02   | 5.647038e-02   | 0.000000e+00 |              |              |

## Analysis of metric invariance

```
model2 <- 'BehaviorInt =~ BI
Habit =~ H1 + H2 + H3 + H4 + H5 + H6 + H7 + H8
H2~~H5 + H6 + H7
H8~~H5 + H7 + H2 + H6 + H4
H5~~H6
CM =~ EA1 + EA2 + PN1 + PN2
PN1~~PN2
EA1~~EA2
SN =~ SN1 + SN2 + SN3
SN1~~SN3
SN2~~PU1
Control =~ PBC1 + PBC2 + EOU1 + EOU2 + PU1 + PU2
EOU1~~EOU2
PBC1~~PBC2
PU2~~EOU1 + EOU2
PBC2~~PU1 + SN2 + SN3
Trust =~ T1 + T2 + T3
BehaviorInt~ c(a,a,a,a)*Habit + c(b,b,b,b)*CM + c(c,c,c,c)*SN + c(d,d,d,d)*Control +
c(e,e,e,e)*Trust'

fit2 <- cfa(model2,
  data= d,
  std.lv = TRUE,
  group="group",
  missing="fiml",
  se="robust.mlr")
```

To obtain Chi-squared, degrees of freedom, *p*-value, CFI and RMSEA (with lower and upper ci and *p*-value), run:

```
fit2measures<-lavaan::fitmeasures(fit2)
fit2measures[c('chisq',
  'df',
  'pvalue',
  'cfi',
  'rmsea',
  'rmsea.ci.lower',
  'rmsea.ci.upper',
  'rmsea.pvalue')]
```

| ## | chisq          | df             | pvalue       | cfi          | rmsea        |
|----|----------------|----------------|--------------|--------------|--------------|
| ## | 5.611823e+03   | 9.790000e+02   | 0.000000e+00 | 9.460844e-01 | 5.584279e-02 |
| ## | rmsea.ci.lower | rmsea.ci.upper | rmsea.pvalue |              |              |
| ## | 5.442848e-02   | 5.726637e-02   | 0.000000e+00 |              |              |

## Analysis of scalar invariance (fixed loading for habits)

```

model3 <- 'BehaviorInt =~ BI
Habit =~ 1*H1 + c(f,f,f,f)*H2 + c(g,g,g,g)*H3 +
c(h,h,h,h)*H4 + c(i,i,i,i)*H5 + c(j,j,j,j)*H6 +
c(k,k,k,k)*H7 + c(l,l,l,l)*H8
H2~~H5 + H6 + H7
H8~~H5 + H7 + H2 + H6 + H4
H5~~H6
CM =~ EA1 + EA2 + PN1 + PN2
PN1~~PN2
EA1~~EA2
SN =~ SN1 + SN2 + SN3
SN1~~SN3
SN2~~PU1
Control =~ PBC1 + PBC2 + EOU1 + EOU2 + PU1 + PU2
EOU1~~EOU2
PBC1~~PBC2
PU2~~EOU1 + EOU2
PBC2~~PU1 + SN2 + SN3
Trust =~ T1 + T2 + T3
BehaviorInt~ c(a,a,a,a)*Habit + c(b,b,b,b)*CM +
c(c,c,c,c)*SN + c(d,d,d,d)*Control + c(e,e,e,e)*Trust'

fit3 <- cfa(model3,
  data= d,
  std.lv = TRUE,
  group="group",
  missing="fiml",
  se="robust.mlr")

```

To obtain Chi-squared, degrees of freedom, *p*-value, CFI and RMSEA (with lower and upper ci and *p*-value), run:

```

fit3measures<-lavaan::fitmeasures(fit3)
fit3measures[c('chisq',
  'df',
  'pvalue',
  'cfi',
  'rmsea',
  'rmsea.ci.lower',
  'rmsea.ci.upper',
  'rmsea.pvalue'')]

```

| ## | chisq          | df             | pvalue       | cfi          | rmsea        |
|----|----------------|----------------|--------------|--------------|--------------|
| ## | 6.520621e+03   | 1.004000e+03   | 0.000000e+00 | 9.357990e-01 | 6.017351e-02 |
| ## | rmsea.ci.lower | rmsea.ci.upper | rmsea.pvalue |              |              |
| ## | 5.878603e-02   | 6.156974e-02   | 0.000000e+00 |              |              |

Analysis of scalar invariance (fixed loading for habits and Climate Morality (CL))

```

model4 <- 'BehaviorInt =~ BI
Habit =~ 1*H1 + c(f,f,f,f)*H2 + c(g,g,g,g)*H3 +
c(h,h,h,h)*H4 + c(i,i,i,i)*H5 + c(j,j,j,j)*H6 +
c(k,k,k,k)*H7 + c(l,l,l,l)*H8
H2~~H5 + H6 + H7
H8~~H5 + H7 + H2 + H6 + H4
H5~~H6
CM =~ c(m,m,m,m)*EA1 + c(n,n,n,n)*EA2 +
c(o,o,o,o)*PN1 + c(p,p,p,p)*PN2
PN1~~PN2
EA1~~EA2
SN =~ SN1 + SN2 + SN3
SN1~~SN3
SN2~~PU1
Control =~ PBC1 + PBC2 + EOU1 + EOU2 + PU1 + PU2
EOU1~~EOU2
PBC1~~PBC2
PU2~~EOU1 + EOU2
PBC2~~PU1 + SN2 + SN3
Trust =~ T1 + T2 + T3
BehaviorInt~ c(a,a,a,a)*Habit + c(b,b,b,b)*CM +
c(c,c,c,c)*SN + c(d,d,d,d)*Control + c(e,e,e,e)*Trust'

fit4 <- cfa(model4,
  data= d,
  std.lv = TRUE,
  group="group",
  missing="fiml",
  se="robust.mlr")

```

To obtain Chi-squared, degrees of freedom, *p*-value, CFI and RMSEA (with lower and upper ci and *p*-value), run:

```

fit4measures<-lavaan::fitmeasures(fit4)
fit4measures[c('chisq',
  'df',
  'pvalue',
  'cfi',
  'rmsea',
  'rmsea.ci.lower',
  'rmsea.ci.upper',
  'rmsea.pvalue'')]

```

| ## | chisq          | df             | pvalue       | cfi          | rmsea        |
|----|----------------|----------------|--------------|--------------|--------------|
| ## | 6.699104e+03   | 1.016000e+03   | 0.000000e+00 | 9.338615e-01 | 6.071298e-02 |
| ## | rmsea.ci.lower | rmsea.ci.upper | rmsea.pvalue |              |              |
| ## | 5.933469e-02   | 6.209987e-02   | 0.000000e+00 |              |              |

For all fit measures, run:

```
summary(fit1, fit.measures=TRUE, ci= TRUE) #model1
summary(fit2, fit.measures=TRUE, ci= TRUE) #model2
summary(fit3, fit.measures=TRUE, ci= TRUE) #model3
summary(fit4, fit.measures=TRUE, ci= TRUE) #model4
```

## Software environment

This document was created with the following environment:

```
sessionInfo()
```

```
## R version 3.6.0 (2019-04-26)
## Platform: x86_64-apple-darwin15.6.0 (64-bit)
## Running under: macOS 10.15.7
##
## Matrix products: default
## BLAS: /Library/Frameworks/R.framework/Versions/3.6/Resources/lib/libRblas.0.dylib
## LAPACK: /Library/Frameworks/R.framework/Versions/3.6/Resources/lib/libRlapack.dylib
##
## locale:
## [1] en_US.UTF-8/en_US.UTF-8/en_US.UTF-8/C/en_US.UTF-8/en_US.UTF-8
##
## attached base packages:
## [1] stats      graphics  grDevices  utils      datasets  methods   base
##
## other attached packages:
## [1] semTable_1.8      Lambda4_3.0      psych_1.8.12     sjPlot_2.8.4
## [5] semTools_0.5-3    semPlot_1.1.2    piecewiseSEM_2.1.0 lavaan_0.6-7
## [9] kableExtra_1.2.1  forcats_0.4.0    stringr_1.4.0     dplyr_0.8.4
## [13] purrr_0.3.2       readr_1.3.1      tidyr_1.0.2       tibble_2.1.3
## [17] ggplot2_3.3.2     tidyverse_1.2.1
##
## loaded via a namespace (and not attached):
## [1] readxl_1.3.1      backports_1.1.4   Hmisc_4.2-0
## [4] BDgraph_2.59      plyr_1.8.4        igraph_1.2.4.1
## [7] splines_3.6.0     TH.data_1.0-10    digest_0.6.20
## [10] htmltools_0.3.6   matrixcalc_1.0-3  magrittr_1.5
## [13] Rsolnp_1.16       checkmate_1.9.4   lisrelToR_0.1.4
## [16] cluster_2.0.8     openxlsx_4.1.0    modelr_0.1.4
## [19] sandwich_2.5-1    jpeg_0.1-8        sem_3.1-9
## [22] colorspace_1.4-1  rvest_0.3.4       haven_2.1.0
## [25] xfun_0.19         crayon_1.3.4      jsonlite_1.6
## [28] lme4_1.1-21       regsem_1.3.9      zeallot_0.1.0
## [31] survival_2.44-1.1 zoo_1.8-5         glue_1.3.1
## [34] gtable_0.3.0      emmeans_1.5.1     webshot_0.5.2
## [37] sjstats_0.17.9    sjmisc_2.8.3      mi_1.0
## [40] car_3.0-2         ggm_2.3           abind_1.4-5
## [43] scales_1.1.1      mvtnorm_1.0-10   ggeffects_0.15.1
## [46] Rcpp_1.0.2        performance_0.4.4 viridisLite_0.3.0
## [49] xtable_1.8-4      htmlTable_1.13.1  foreign_0.8-71
## [52] Formula_1.2-3     stats4_3.6.0      truncnorm_1.0-8
```



|          |                    |                     |                    |
|----------|--------------------|---------------------|--------------------|
| ## [55]  | htmlwidgets_1.3    | httr_1.4.0          | DiagrammeR_1.0.5   |
| ## [58]  | RColorBrewer_1.1-2 | acepack_1.4.1       | pkgconfig_2.0.2    |
| ## [61]  | XML_3.99-0.3       | nnet_7.3-12         | kutils_1.69        |
| ## [64]  | effectsize_0.2.0   | tidyselect_0.2.5    | rlang_0.4.7        |
| ## [67]  | reshape2_1.4.3     | munsell_0.5.0       | cellranger_1.1.0   |
| ## [70]  | tools_3.6.0        | visNetwork_2.0.9    | cli_1.1.0          |
| ## [73]  | generics_0.0.2     | sjlabelled_1.1.3    | broom_0.5.2        |
| ## [76]  | fdrtool_1.2.15     | evaluate_0.14       | arm_1.10-1         |
| ## [79]  | yaml_2.2.0         | knitr_1.30          | stationery_0.98.30 |
| ## [82]  | zip_2.1.1          | glasso_1.10         | pbapply_1.4-0      |
| ## [85]  | nlme_3.1-139       | whisker_0.3-2       | xml2_1.2.0         |
| ## [88]  | compiler_3.6.0     | rstudioapi_0.10     | curl_3.3           |
| ## [91]  | png_0.1-7          | huge_1.3.2          | pbivnorm_0.6.0     |
| ## [94]  | stringi_1.4.3      | parameters_0.8.2    | qgraph_1.6.2       |
| ## [97]  | rockchalk_1.8.144  | lattice_0.20-38     | Matrix_1.2-17      |
| ## [100] | nloptr_1.2.1       | vctrs_0.2.0         | pillar_1.4.2       |
| ## [103] | lifecycle_0.1.0    | OpenMx_2.15.5       | estimability_1.3   |
| ## [106] | insight_0.9.1      | data.table_1.12.2   | corpcor_1.6.9      |
| ## [109] | R6_2.4.0           | latticeExtra_0.6-28 | gridExtra_2.3      |
| ## [112] | rio_0.5.16         | codetools_0.2-16    | boot_1.3-22        |
| ## [115] | MASS_7.3-51.4      | gtools_3.8.1        | assertthat_0.2.1   |
| ## [118] | rjson_0.2.20       | withr_2.1.2         | mnormt_1.5-5       |
| ## [121] | multcomp_1.4-10    | bayestestR_0.7.2    | parallel_3.6.0     |
| ## [124] | hms_0.4.2          | grid_3.6.0          | rpart_4.1-15       |
| ## [127] | coda_0.19-3        | minqa_1.2.4         | rmarkdown_1.12     |
| ## [130] | carData_3.0-2      | d3Network_0.5.2.1   | lubridate_1.7.4    |
| ## [133] | base64enc_0.1-3    |                     |                    |
